# Supplementary material for: Attitudes Toward Psychedelic-Assisted Therapies for Cancer-Related Psychosocial Symptoms: A Multi- Stakeholder Analysis
Source: Research Square preprint supplement (doi:10.21203/rs.3.rs-6941009/v1), 2025-08-19
Supplement: Supplementary file 1 [file 6b69db8232563421572eda42.docx]

**Supplementary Material**

Table A1. Perceived Effectiveness (%) of Psychedelic Agents by Stakeholder Group

| Group | Psychedelic Agent | Very Effective | Somewhat Effective | Neutral | Somewhat Ineffective | Not at all Effective |
| --- | --- | --- | --- | --- | --- | --- |
| HCP | Ketamine | 24.0 | 46.4 | 20.0 | 7.2 | 2.4 |
| HCP | LSD | 29.9 | 38.5 | 21.4 | 6.8 | 3.4 |
| HCP | MDMA | 13.7 | 50.4 | 24.8 | 8.5 | 2.6 |
| HCP | Psilocybin | 43.6 | 38.3 | 13.5 | 3.8 | 0.8 |
| PLWC | Ketamine | 12.7 | 32.4 | 23.5 | 19.2 | 12.2 |
| PLWC | LSD | 11.4 | 31.1 | 28.9 | 14.9 | 13.8 |
| PLWC | MDMA | 9.9 | 35.2 | 36.0 | 14.0 | 4.8 |
| PLWC | Psilocybin | 19.3 | 36.5 | 18.5 | 15.7 | 10.0 |
| PM | Ketamine | 32.3 | 45.2 | 12.9 | 6.5 | 3.2 |
| PM | LSD | 41.9 | 32.3 | 19.4 | 6.5 | 0.0 |
| PM | MDMA | 12.9 | 64.5 | 12.9 | 9.7 | 0.0 |
| PM | Psilocybin | 53.1 | 31.2 | 6.2 | 9.4 | 0.0 |

Table A2. Perceived Safety Concern (%) of Psychedelic Agents by Stakeholder Group

| Group | Psychedelic Agent | Very Concerned | Somewhat Concerned | Neutral | Somewhat Unconcerned | Not at all Concerned |
| --- | --- | --- | --- | --- | --- | --- |
| HCP | Ketamine | 13.6 | 32.9 | 25.0 | 17.9 | 10.7 |
| HCP | LSD | 16.8 | 39.9 | 13.3 | 22.4 | 7.7 |
| HCP | MDMA | 16.8 | 42.7 | 19.6 | 13.3 | 7.7 |
| HCP | Psilocybin | 23.6 | 37.5 | 13.2 | 11.8 | 13.9 |
| PLWC | Ketamine | 15.5 | 32.3 | 23.9 | 15.0 | 13.2 |
| PLWC | LSD | 14.4 | 30.4 | 25.5 | 20.3 | 9.4 |
| PLWC | MDMA | 12.2 | 33.2 | 30.0 | 17.1 | 7.6 |
| PLWC | Psilocybin | 16.0 | 35.1 | 16.2 | 13.5 | 19.2 |
| PM | Ketamine | 42.4 | 30.3 | 15.2 | 6.1 | 6.1 |
| PM | LSD | 24.2 | 36.4 | 24.2 | 9.1 | 6.1 |
| PM | MDMA | 18.2 | 45.5 | 27.3 | 0.0 | 9.1 |
| PM | Psilocybin | 36.4 | 45.5 | 3.0 | 6.1 | 9.1 |

Table B1. Complete Regression Model Summary for APQ Outcomes

| Term | Estimate | Std. Error | Statistic | p-Value | Outcome | R² | Adj. R² |
| --- | --- | --- | --- | --- | --- | --- | --- |
| (Intercept) | 59.2 | 1.63 | 36.3 | 0.0 | APQ_Total | 0.288 | 0.276 |
| knowledge | -1.34 | 0.356 | -3.75 | 0.00021 | APQ_Total | 0.288 | 0.276 |
| age_cont | 0.483 | 0.308 | 1.57 | 0.118 | APQ_Total | 0.288 | 0.276 |
| genderMale | -0.139 | 0.841 | -0.165 | 0.869 | APQ_Total | 0.288 | 0.276 |
| politics | -0.919 | 1.05 | -0.878 | 0.38 | APQ_Total | 0.288 | 0.276 |
| group_HCP | -6.02 | 1.03 | -5.84 | 0.0 | APQ_Total | 0.288 | 0.276 |
| group_PM | -14.0 | 1.83 | -7.64 | 0.0 | APQ_Total | 0.288 | 0.276 |
| (Intercept) | 14.3 | 0.473 | 30.3 | 0.0 | APQ_Legal | 0.275 | 0.263 |
| knowledge | -0.273 | 0.103 | -2.66 | 0.00817 | APQ_Legal | 0.275 | 0.263 |
| age_cont | 0.188 | 0.0882 | 2.13 | 0.0339 | APQ_Legal | 0.275 | 0.263 |
| genderMale | -0.525 | 0.243 | -2.16 | 0.0311 | APQ_Legal | 0.275 | 0.263 |
| politics | -0.22 | 0.3 | -0.733 | 0.464 | APQ_Legal | 0.275 | 0.263 |
| group_HCP | -1.86 | 0.301 | -6.17 | 0.0 | APQ_Legal | 0.275 | 0.263 |
| group_PM | -4.16 | 0.523 | -7.95 | 0.0 | APQ_Legal | 0.275 | 0.263 |
| (Intercept) | 15.6 | 0.519 | 30.0 | 0.0 | APQ_Effects | 0.228 | 0.215 |
| knowledge | -0.476 | 0.113 | -4.21 | 3e-05 | APQ_Effects | 0.228 | 0.215 |
| age_cont | 0.0838 | 0.0969 | 0.865 | 0.388 | APQ_Effects | 0.228 | 0.215 |
| genderMale | 0.0441 | 0.267 | 0.165 | 0.869 | APQ_Effects | 0.228 | 0.215 |
| politics | -0.437 | 0.33 | -1.33 | 0.186 | APQ_Effects | 0.228 | 0.215 |
| group_HCP | -1.36 | 0.331 | -4.12 | 5e-05 | APQ_Effects | 0.228 | 0.215 |
| group_PM | -3.42 | 0.557 | -6.14 | 0.0 | APQ_Effects | 0.228 | 0.215 |
| (Intercept) | 15.6 | 0.503 | 31.0 | 0.0 | APQ_Risk | 0.239 | 0.226 |
| knowledge | -0.494 | 0.11 | -4.5 | 1e-05 | APQ_Risk | 0.239 | 0.226 |
| age_cont | 0.102 | 0.095 | 1.07 | 0.284 | APQ_Risk | 0.239 | 0.226 |
| genderMale | -0.112 | 0.26 | -0.431 | 0.667 | APQ_Risk | 0.239 | 0.226 |
| politics | -0.538 | 0.32 | -1.68 | 0.0933 | APQ_Risk | 0.239 | 0.226 |
| group_HCP | -1.21 | 0.32 | -3.78 | 0.00018 | APQ_Risk | 0.239 | 0.226 |
| group_PM | -3.45 | 0.541 | -6.37 | 0.0 | APQ_Risk | 0.239 | 0.226 |
| (Intercept) | 14.2 | 0.455 | 31.2 | 0.0 | APQ_Openness | 0.126 | 0.111 |
| knowledge | -0.143 | 0.0989 | -1.45 | 0.148 | APQ_Openness | 0.126 | 0.111 |
| age_cont | 0.0997 | 0.0848 | 1.18 | 0.24 | APQ_Openness | 0.126 | 0.111 |
| genderMale | 0.215 | 0.234 | 0.916 | 0.36 | APQ_Openness | 0.126 | 0.111 |
| politics | -0.172 | 0.288 | -0.596 | 0.551 | APQ_Openness | 0.126 | 0.111 |
| group_HCP | -1.22 | 0.29 | -4.22 | 3e-05 | APQ_Openness | 0.126 | 0.111 |
| group_PM | -2.42 | 0.506 | -4.79 | 0.0 | APQ_Openness | 0.126 | 0.111 |

Table B2. Variance Inflation Factor (VIF) Diagnostics for APQ Total Regression Model

| Predictor | GVIF | Df | GVIF1/(2×Df) |
| --- | --- | --- | --- |
| knowledge_combined | 1.159 | 1 | 1.077 |
| age_combined | 1.052 | 1 | 1.025 |
| gender_combined | 1.044 | 1 | 1.022 |
| political_combined | 1.111 | 1 | 1.054 |
| group_label | 1.240 | 2 | 1.055 |

Note: All GVIF<sup>1/(2×Df)</sup> values are well below 2.0, indicating no concerning multicollinearity.

# Table B3. Regression Results Summary without Group Label as a Predictor

| Outcome | Predictor | B (SE) | p-value | R² |
| --- | --- | --- | --- | --- |
| APQ Total | Self-rated Knowledge | -1.47 (0.36) | < .001 | .258 |
| APQ Total | Age | 0.42 (0.31) | .187 | .258 |
| APQ Total | Male Gender | -0.67 (0.85) | .429 | .258 |
| APQ Total | Liberal-Oriented | -0.68 (0.63) | .011 | .258 |
| APQ Total | Prior Experience | 7.64 (0.98) | < .001 | .258 |
| Legal Use | Self-rated Knowledge | -0.33 (0.11) | .002 | .261 |
| Legal Use | Age | 0.21 (0.09) | .083 | .261 |
| Legal Use | Male Gender | -0.58 (0.25) | .021 | .261 |
| Legal Use | Liberal-Oriented | -0.03 (0.31) | .923 | .261 |
| Legal Use | Prior Experience | 2.48 (0.29) | < .001 | .261 |
| Perceived Effects | Self-rated Knowledge | -0.48 (0.12) | < .001 | .195 |
| Perceived Effects | Age | 0.07 (0.10) | .480 | .195 |
| Perceived Effects | Male Gender | -0.14 (0.27) | .598 | .195 |
| Perceived Effects | Liberal-Oriented | -0.83 (0.38) | .034 | .195 |
| Perceived Effects | Prior Experience | 1.85 (0.32) | < .001 | .195 |
| Risk Concerns | Self-rated Knowledge | -0.53 (0.11) | < .001 | .217 |
| Risk Concerns | Age | 0.11 (0.08) | .020 | .217 |
| Risk Concerns | Male Gender | -0.21 (0.26) | .417 | .217 |
| Risk Concerns | Liberal-Oriented | -0.22 (0.33) | .505 | .217 |
| Risk Concerns | Prior Experience | 1.84 (0.31) | < .001 | .217 |
| Openness | Self-rated Knowledge | -0.14 (0.10) | .099 | .117 |
| Openness | Age | 0.08 (0.09) | .044 | .117 |
| Openness | Male Gender | 0.27 (0.24) | .027 | .117 |
| Openness | Liberal-Oriented | -0.47 (0.30) | .000 | .117 |
| Openness | Prior Experience | 1.47 (0.28) | < .001 | .117 |
